# Supplementary material
Source: PubMed Central journal article supplement (PMC5047087)
Supplement: supp_pp.16.00735_PP2016-00735R1_Supplemental_Material.pdf [file supp_pp.16.00735_PP2016-00735R1_Supplemental_Material.pdf]

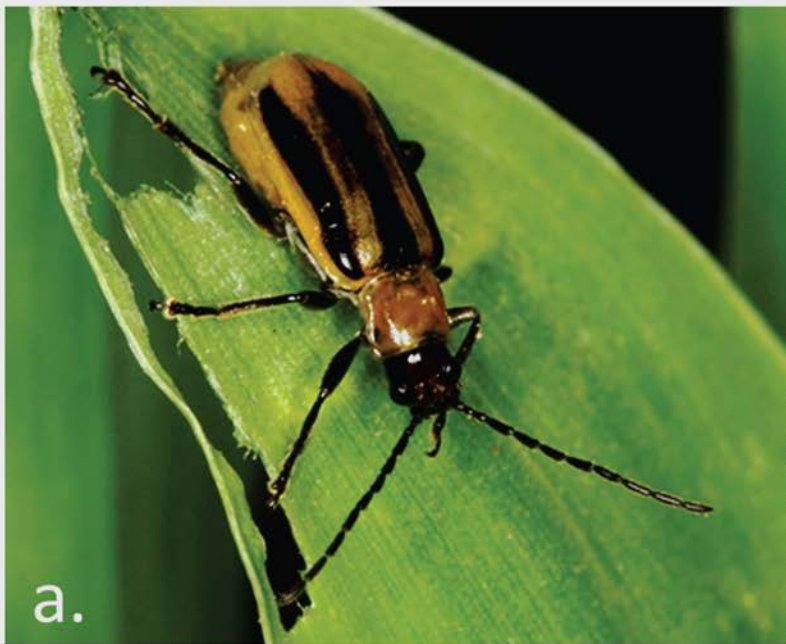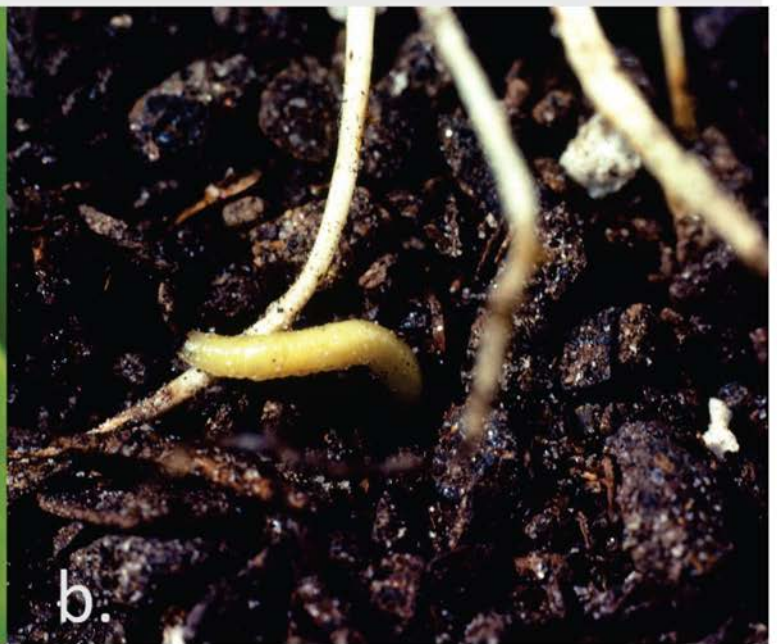

**Supplemental Figure 1.** Panel a: adult beetle of *Diabrotica virgifera virgifera*, LeConte. Panel b: immature larva of *D. v. virgifera*.
