# Supplementary material
Source: PubMed Central journal article supplement (PMC5047087)
Supplement: supp_pp.16.00735_PP2016-00735R1_Supplemental_Materialfig3.pdf [file supp_pp.16.00735_PP2016-00735R1_Supplemental_Materialfig3.pdf]

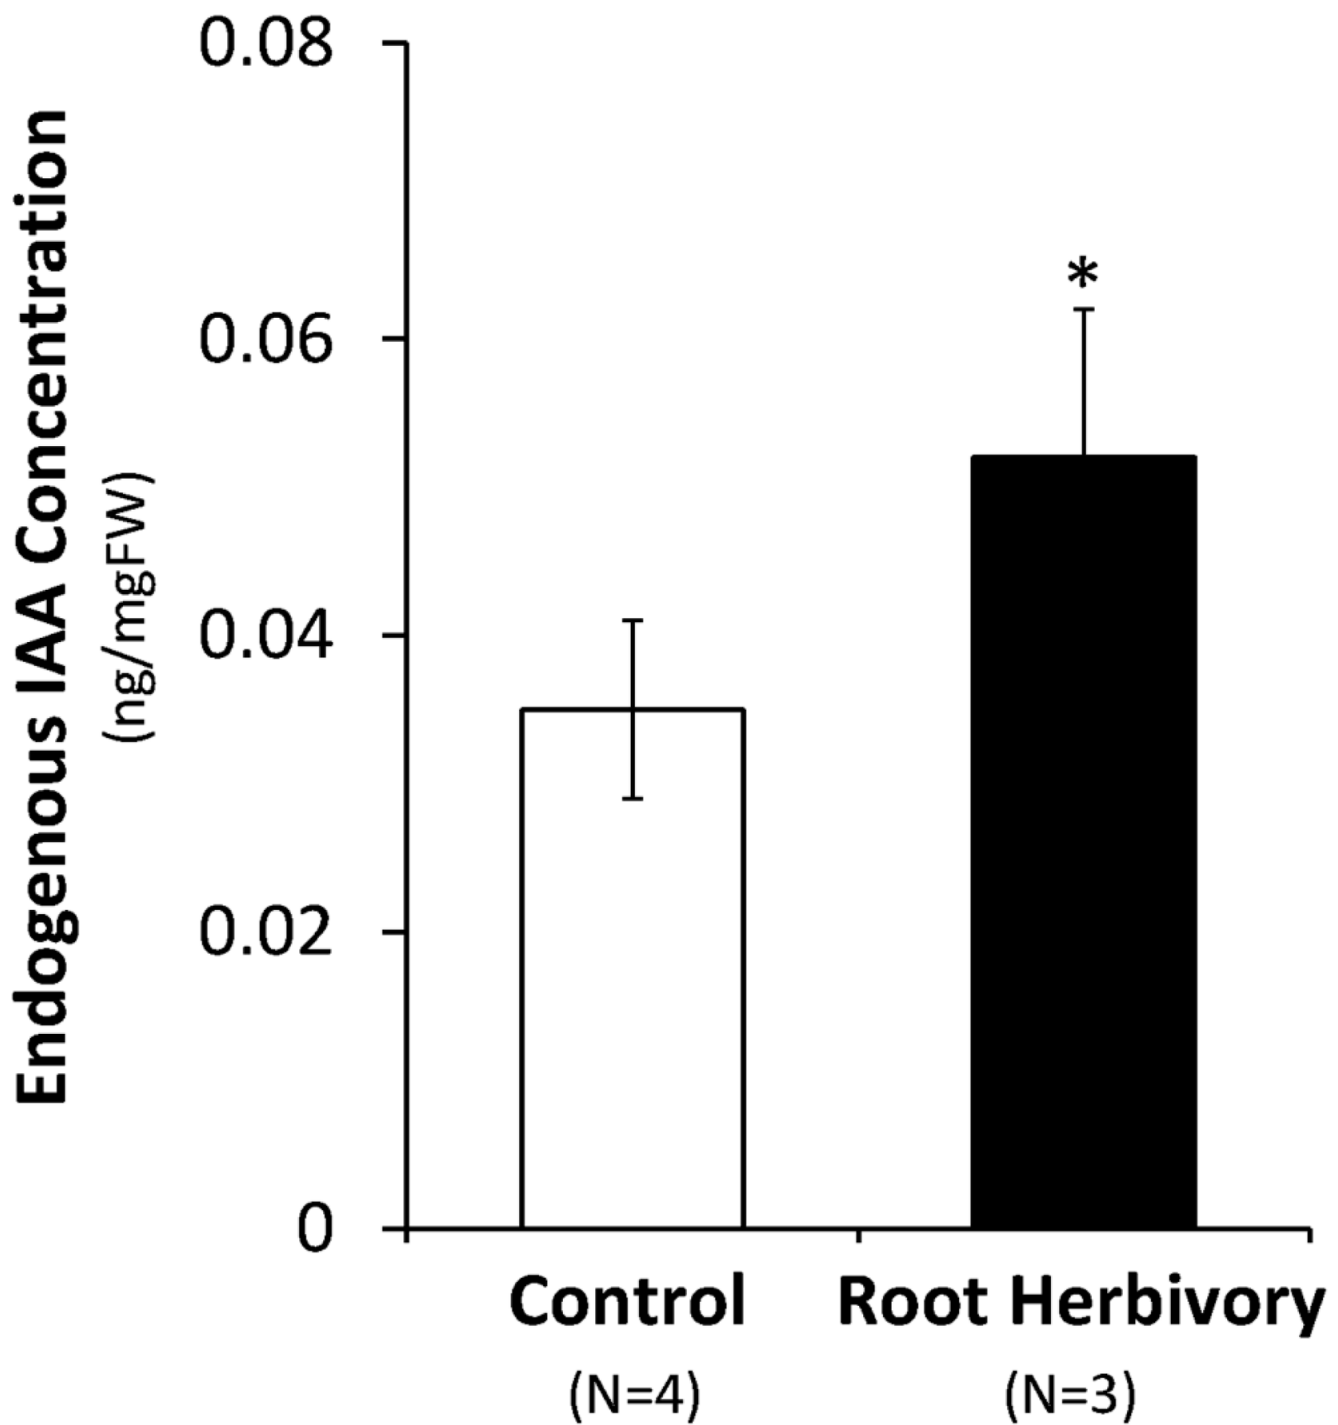

**Supplemental Figure 3.** Endogeneous nodal root auxin (IAA) concentrations presented as  $\text{ng mgFW}^{-1}$  and plotted as a function of root herbivore treatment. Statistical significance was denoted as: \*,  $P \leq 0.05$ ; \*\*,  $P \leq 0.01$ ; \*\*\*,  $P \leq 0.001$ .
