# Supplementary material
Source: PubMed Central journal article supplement (PMC5047087)
Supplement: supp_pp.16.00735_PP2016-00735R1_Supplemental_Materialfig4.pdf [file supp_pp.16.00735_PP2016-00735R1_Supplemental_Materialfig4.pdf]

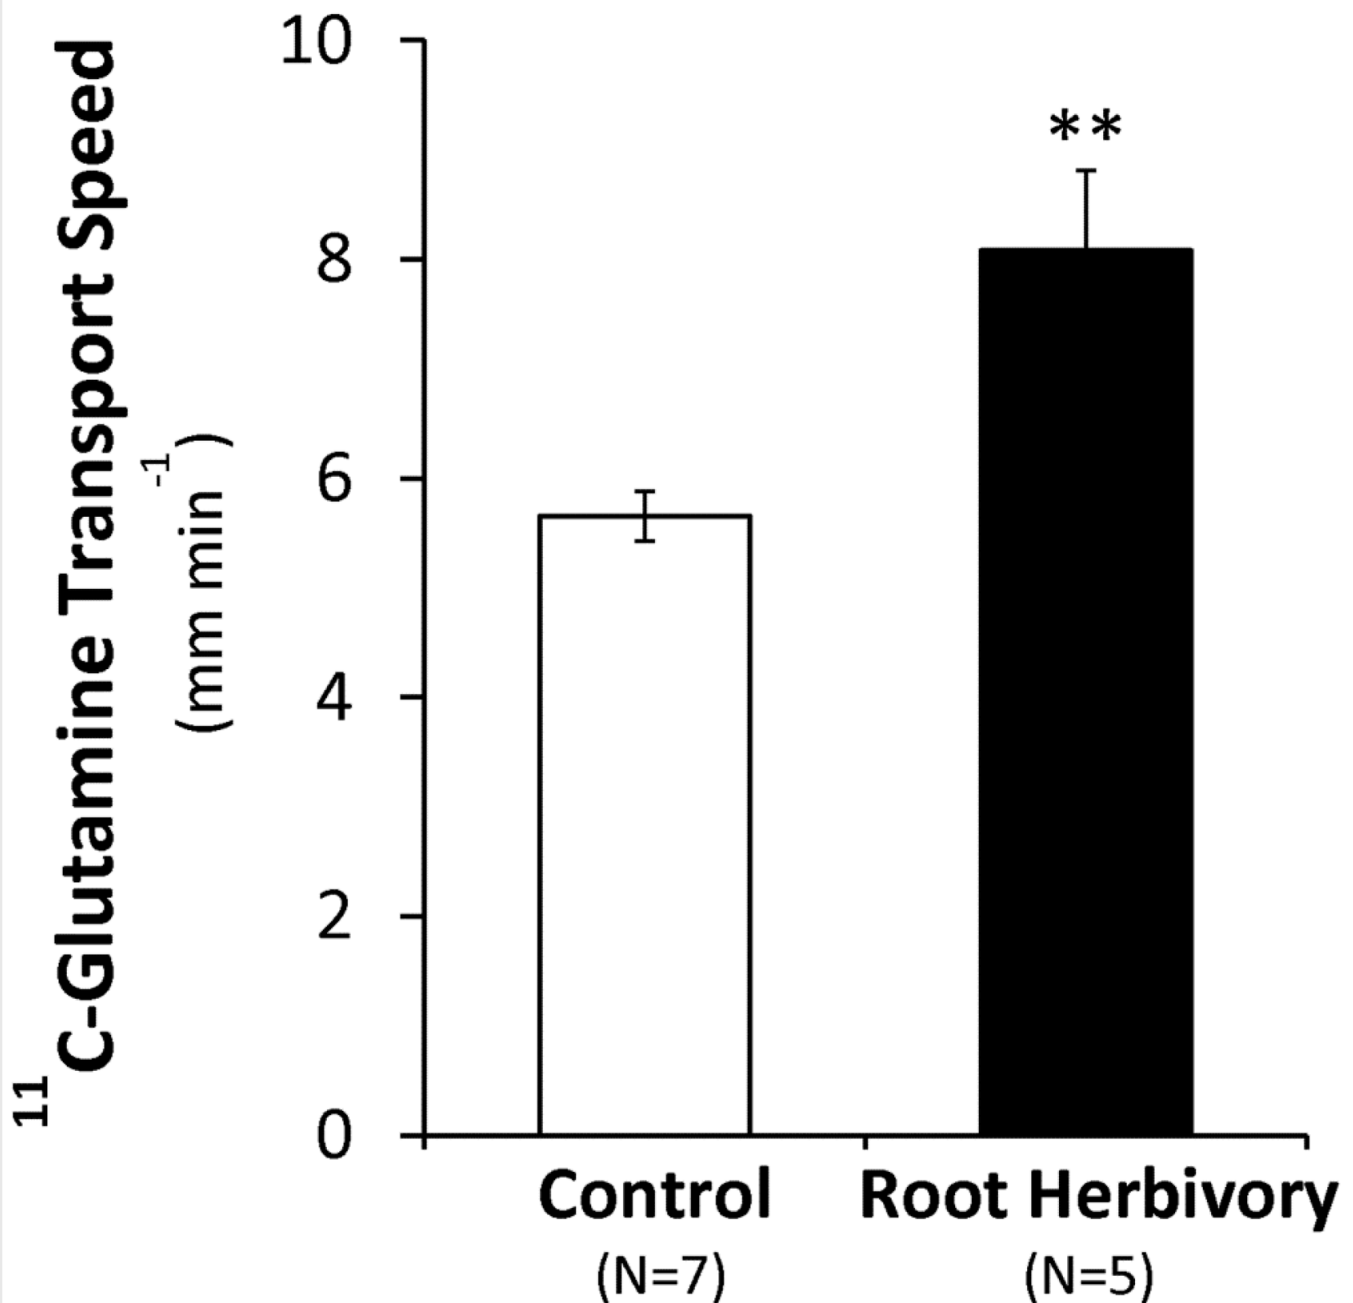

**Supplemental Figure 4.** Transport speed ( $\text{mm min}^{-1}$ ) of L-[5- $^{11}\text{C}$ ]glutamine plotted as a function of root herbivore treatment. Statistical significance was denoted as: \*,  $P \leq 0.05$ ; \*\*,  $P \leq 0.01$ ; \*\*\*,  $P \leq 0.001$ .
